# Supplementary figures and images for: Conservation defines functional motifs in the squint/nodal-related 1 RNA dorsal localization element
Source: PubMed Central journal article supplement — Nucleic Acids Res. 2010 Dec 10;39(8):3340–9. doi: 10.1093/nar/gkq1185 (PMC3082914; doi:10.1093/nar/gkq1185), 2010-12-10

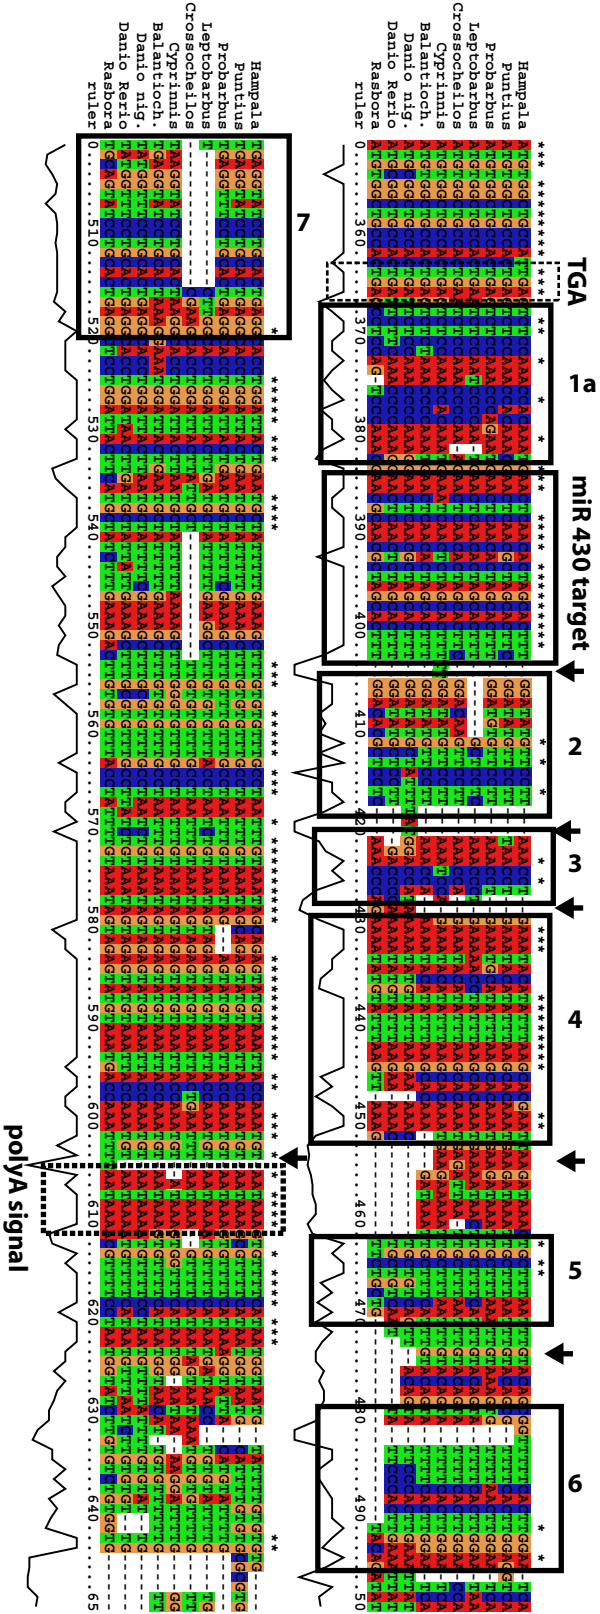

Supplementary Figure S1

Supplement: supp_gkq1185_Supplementary_Figure_S1.pdf [file supp_gkq1185_Supplementary_Figure_S1.pdf]
